# Supplementary material for: High performance of Ni0.9Mn1.8Mg0.3O4 spinel nanoceramic microbeads via inkjet printing and two step sintering
Source: Royal Society of Chemistry journal article supplement (doi:10.1039/c5ra26760a), 2016-01-01
Supplement: c5ra26760a1.pdf [file c5ra26760a1.pdf]

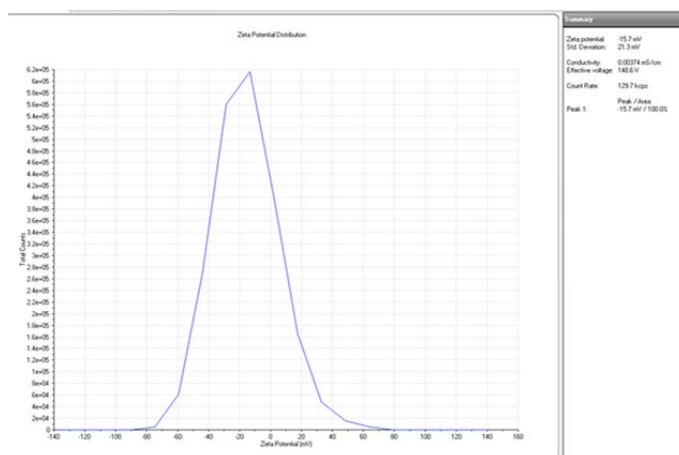

Fig. S1. Zeta potential curves of NMM ceramic inks

The zeta potential is one criterion to judge the stability of ceramic inks. Therefore, we add the zeta potential test below as support materials. The zeta potential value of ceramic inks is 15.7 mv, which indicates the well stability of NMM ceramic inks.

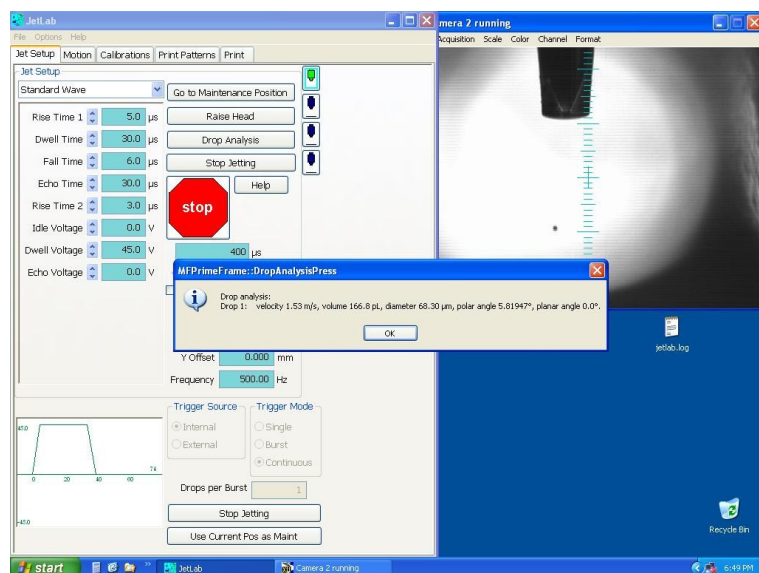

Fig. S2 The inkjet-printing debugging picture of NMM ceramic inks

The ink-jet printer system (Microfab, inkjet II, USA) was purchased and assembled. The system is consisted of a piezoelectric ink-jet head with 80  $\mu\text{m}$  nozzle, electrical control system, pneumatic control system and CCD camera system. We can set drop number (1-999) by electrical trigger mode, voltage value and air pressure value in this system to control the inkjet-printing of ceramic inks. The nozzle diameter can be varied between 20 and 80  $\mu\text{m}$ , allowing fluid dispensing on a picoliter scale, with frequencies of up to 10000 drops s<sup>-1</sup> per nozzle. The inkjet-printing debugging picture is shown below as support materials.
